# Supplementary material for: Micropore engineering of carbonized porous aromatic framework (PAF-1) for supercapacitors application
Source: Royal Society of Chemistry journal article supplement (doi:10.1039/c4cp00550c), 2014-01-01
Supplement: c4cp00550c1.pdf [file c4cp00550c1.pdf]

[Supporting Information]

**Pore Engineering of Carbonized Porous Aromatic Framework (PAF-1):  
Supercapacitors Application**

*Yanqiang Li,<sup>a</sup> Soumyajit Roy,<sup>c</sup> Teng Ben,<sup>\*b</sup> Shixian Xu,<sup>a</sup> Shilun Qiu<sup>\*a</sup>*

*<sup>a</sup> State Key Laboratory of Inorganic Synthesis & Preparative Chemistry, Jilin University, Changchun 130012, China. <sup>b</sup> Department of Chemistry, Jilin University, Changchun, 130012, China; <sup>c</sup> EFAML, Materials Science Center, Department of Chemical Sciences, IISER-Kolkata, Mohanpur 741252, India.*

\*To whom correspondence should be addressed. E-mail: [tben@jlu.edu.cn](mailto:tben@jlu.edu.cn); [sqiu@jlu.edu.cn](mailto:sqiu@jlu.edu.cn).

## Table of Contents

|                                                                                     |        |
|-------------------------------------------------------------------------------------|--------|
| <b>1. Experimental section.</b>                                                     | S3-4   |
| <b>2. Cycle performance of K-PAF-1 in KOH electrolyte.</b>                          | S5     |
| <b>3. Enlarged Nyquist curves of carbonized samples in KOH electrolyte.</b>         | S5     |
| <b>4. Electrochemical test of KOH activated samples at different temperature.</b>   | S6     |
| <b>5. Electrochemical test in organic electrolytes.</b>                             | S7-10  |
| <b>6. Analysis of capacitance decreasing trend with increasing current density.</b> | S11-12 |
| <b>7. Nyquist plots of K-PAF-1 in EMImBF<sub>4</sub> and EMImTFSI.</b>              | S12    |
| <b>8. FTIR spectra of PAF-1 and the carbonized samples.</b>                         | S13    |
| <b>9. Raman spectra of the carbonized samples.</b>                                  | S14    |
| <b>10. PXRD patterns of PAF-1 and the carbonized samples.</b>                       | S15    |
| <b>11. TGA curves of PAF-1 and the carbonized samples.</b>                          | S16    |
| <b>12. EDS spectra of K-PAF-1 and Na-PAF-1.</b>                                     | S16    |

## 1. Synthesis of PAF-1 and carbonized samples

PAF-1 was synthesized according to our previous report. The obtained white powder was heated in a furnace tube at a ramp rate of 2 °C min<sup>-1</sup> to 750 °C in high pure (99.999%) nitrogen atmosphere or carbon dioxide and hold for 60 min to produce carbonized samples N<sub>2</sub>-PAF-1 and CO<sub>2</sub>-PAF-1. For KOH and NaOH activation, 100 mg of PAF-1 was impregnated with KOH solution (400 mg in 95 % ethanol), followed by an evaporation in nitrogen atmosphere. The activation was carried out by heating the sample in a furnace tube at a ramp rate of 2 °C min<sup>-1</sup> to the final temperature and hold for 60 min. After cooled in flowing nitrogen, the resulting mixture was washed with 2 M HCl and lots of water to neutral. The activated samples were denoted as K-PAF-1 and Na-PAF-1.

## 2. Characterization

**Fourier transform infrared spectroscopy (FTIR).** The FTIR spectra (KBr, Aldrich) were measured using a SHIMADZU IRAFFINITY-1 Fourier transform infrared spectrometer. Samples were packed firmly to get transparent films.

**Power X-ray diffraction (PXRD) measurements.** The PXRD measurements were performed on a Rigaku D/MAX2550 diffractometer using Cu-K $\alpha$  radiation, 35 kV, 25 mA with scanning rate of 10° min<sup>-1</sup> (2 $\theta$ ).

**Raman spectra.** Raman spectra of the carbonized PAF-1s were measured by using Renishaw inVia Raman spectrometer, with the 514.5 nm line of an Ar ion laser as the excitation. The data was recorded from 1000-2000 cm<sup>-1</sup>.

**Thermogravimetric analysis (TGA).** The thermogravimetric analysis (TGA) was performed using a SHIMADZU DTG-60 thermal analyzer system at the heating rate of 10 °C min<sup>-1</sup> to 800 °C in dried air atmosphere and the air flow rate was 30 mL min<sup>-1</sup>.

**Nitrogen sorption measurements.** Nitrogen sorption experiments were performed at 77 K up to 1 bar using a manometer sorption analyzer Autosorb iQ MP (Quantachrome Instruments). Before sorption analysis, the sample was evacuated at 200 °C for 10 h using a turbo molecular vacuum pump. Specific surface areas were calculated from nitrogen adsorption data by multipoint BET analysis. Pore size distributions were calculated from the N<sub>2</sub> adsorption isotherms using quenched solid density functional theory (QSDFT, nitrogen on carbon, slit pore) method which gives the least fitting error

## 3. Electrochemistry measurement

The working electrodes were prepared by grinding porous carbon (85 wt %, about 40 mg), acetylene black (10 wt %), and polytetrafluoroethylene (5 wt % PTFE, 60 wt % in water, diluted to 6 wt % before use) in a mortar and made into a film about 10 cm<sup>2</sup>. The measured thickness of the electrode membrane was about xx  $\mu$  m. The film was dried at

120 °C for 24 h under vacuum and was cut into square about 1 cm<sup>2</sup>. Then it was pressed on nickel foam under 10 MPa. The typical mass load of the electrode was about 5 mg cm<sup>-2</sup>. Cyclic voltammograms (CV), galvanostatic charge-discharge curves, and Nyquist plots were collected on a CHI660D electrochemical workstation. The electrochemical experiments were carried out using a three-electrode cell, employing platinum as the counter electrode; Hg/HgO electrodes (in 6.0 M KOH) or Ag/AgCl electrodes (for organic electrolytes) as reference electrodes, respectively. The specific capacitance derived from the CV measurement is calculated using the following equation:

$$C = \frac{1}{m \nu (V_c - V_a)} \int_{V_a}^{V_c} I(V) dV \quad (1)$$

where C is the specific capacitance, m is the mass of electrode material,  $\nu$  represents the scan rate,  $V_c$  and  $V_a$  refer to the high and low potential limit of the CV test, and I is the instant current on CV curves..

The gravimetric capacitance was calculated on the basis of the charge-discharge profile according to

$$C = \frac{I \Delta t}{m \Delta V} \quad (2)$$

where I refers to the discharge current (A), and  $\Delta t$  represents the discharge time (s), m is the mass of electrode material (g),  $\Delta V$  is the range of charge-discharge voltage (V).

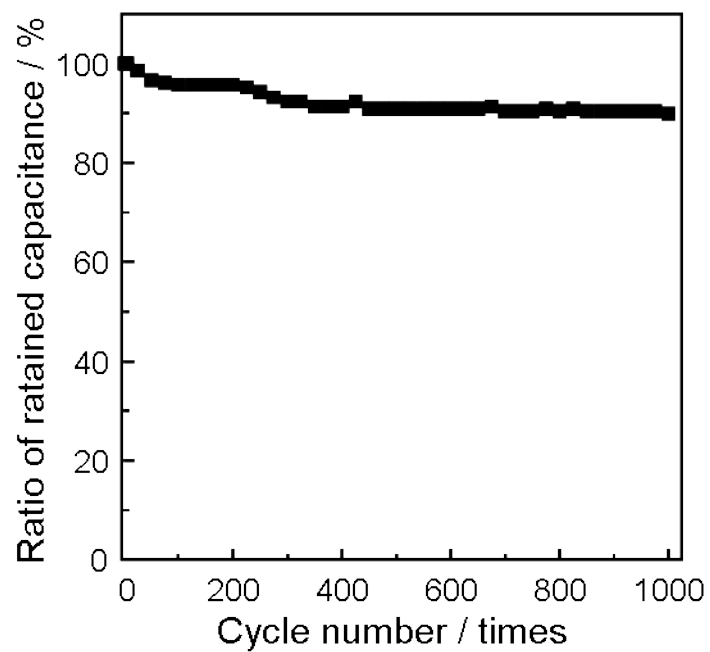

**Figure S1.** Cycle performance of K-PAF-1 in KOH electrolyte.

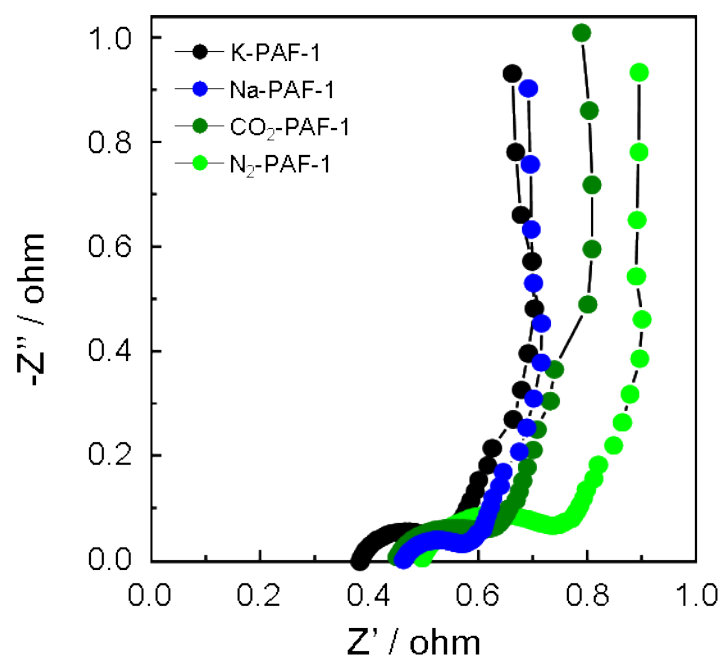

**Figure S2.** Enlarged Nyquist plots of carbonized PAF-1 in 6 M KOH.

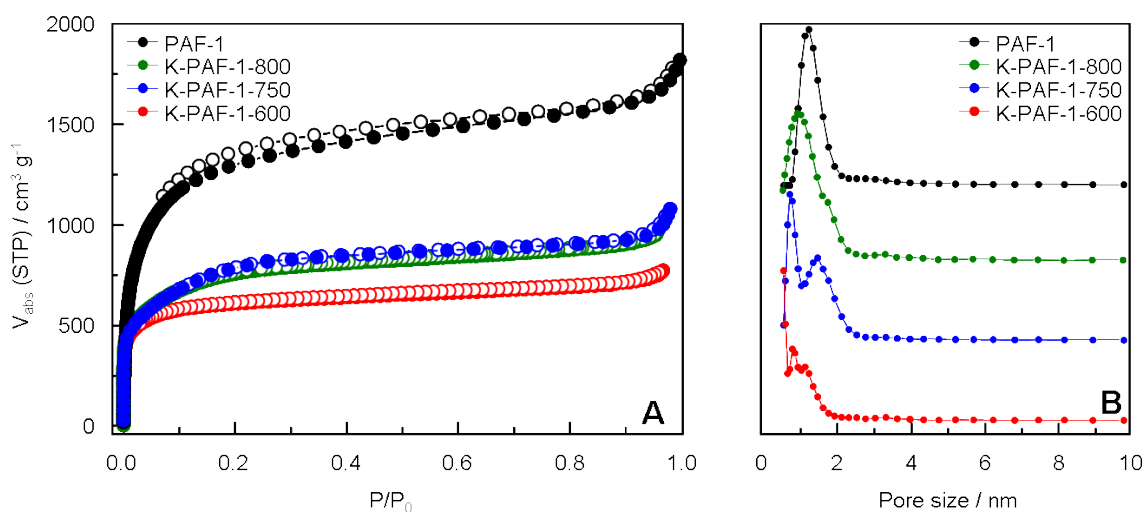

**Figure S3.**  $\text{N}_2$  sorption and pore size distribution of PAF-1 and KOH activated samples at different temperatures.

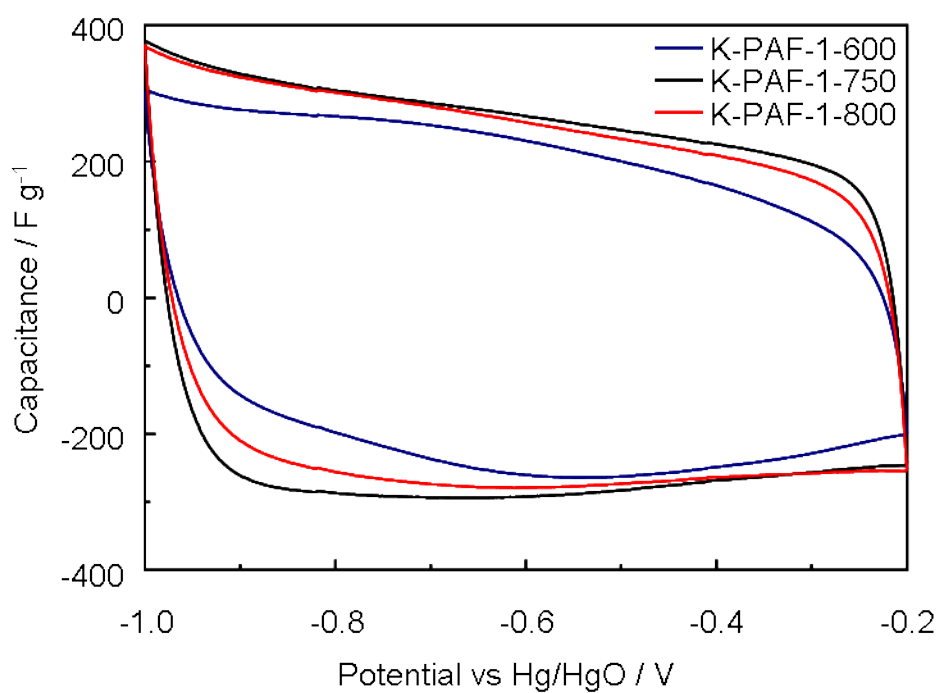

**Figure S4.** CV curves of K-PAF-1-600, K-PAF-1-750, K-PAF-1-800 at a scan rate of  $0.05 \text{ V s}^{-1}$  in 6 M KOH.

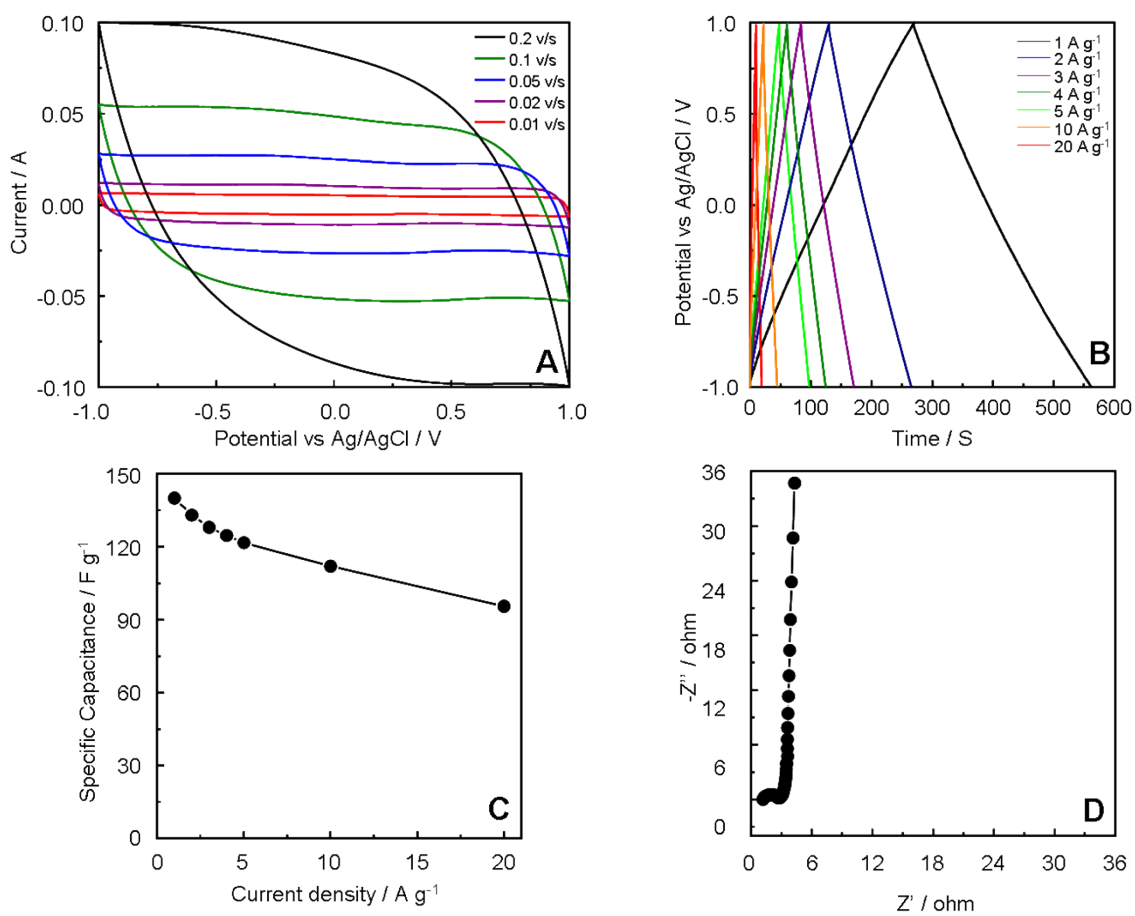

**Figure S5.** (A) CV curves of K-PAF-1 in TEABF<sub>4</sub>; (B) galvanostatic charge–discharge curves of K-PAF-1 at different current density ; (C) capacitance versus current of K-PAF-1; (D) Nyquist plots (frequency ranges from 10<sup>5</sup> to 10<sup>-2</sup> Hz) of K-PAF-1 in TEABF<sub>4</sub>.

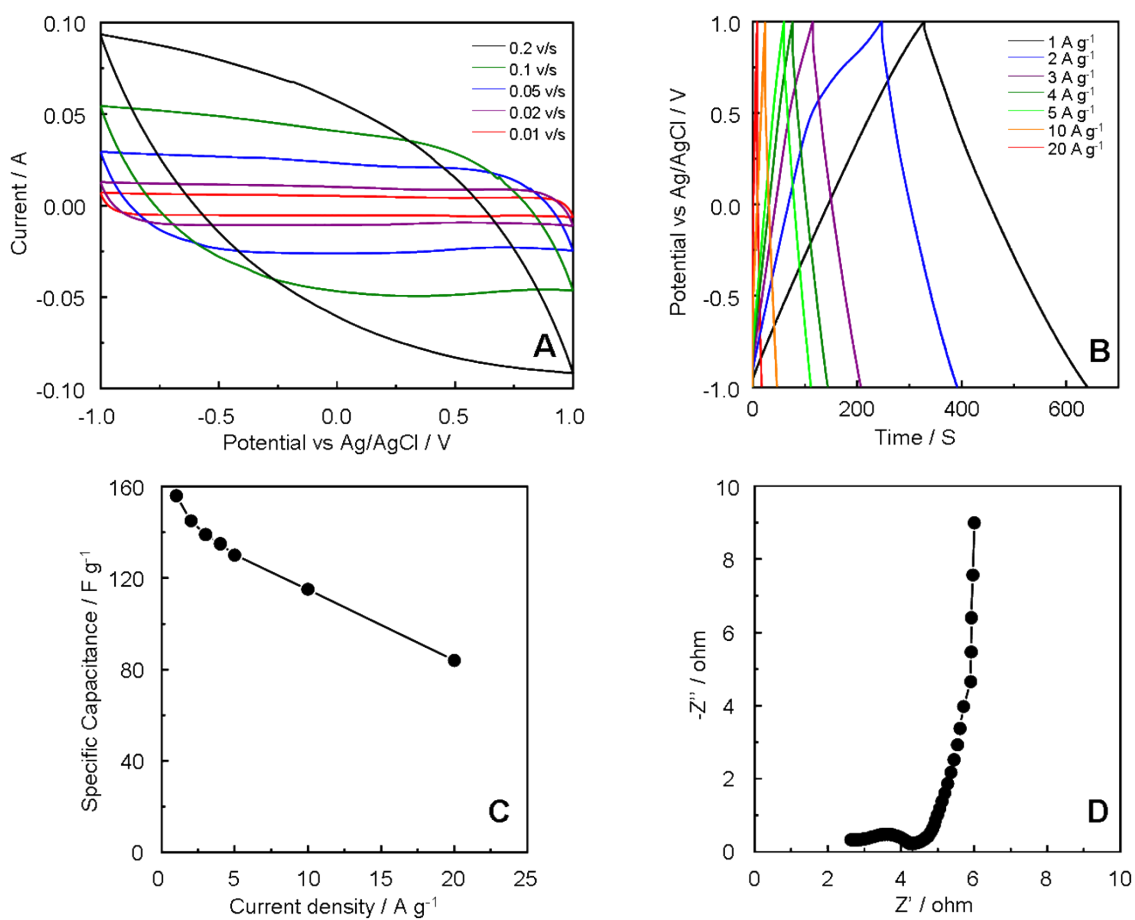

**Figure S6.** (A) CV curves of K-PAF-1; (B) galvanostatic charge–discharge curves of K-PAF-1 at different current density ; (C) capacitance versus current of K-PAF-1; (D) Nyquist plots (frequency ranges from  $10^5$  to  $10^{-2}$  Hz) of K-PAF-1 in EMImBF<sub>4</sub>.



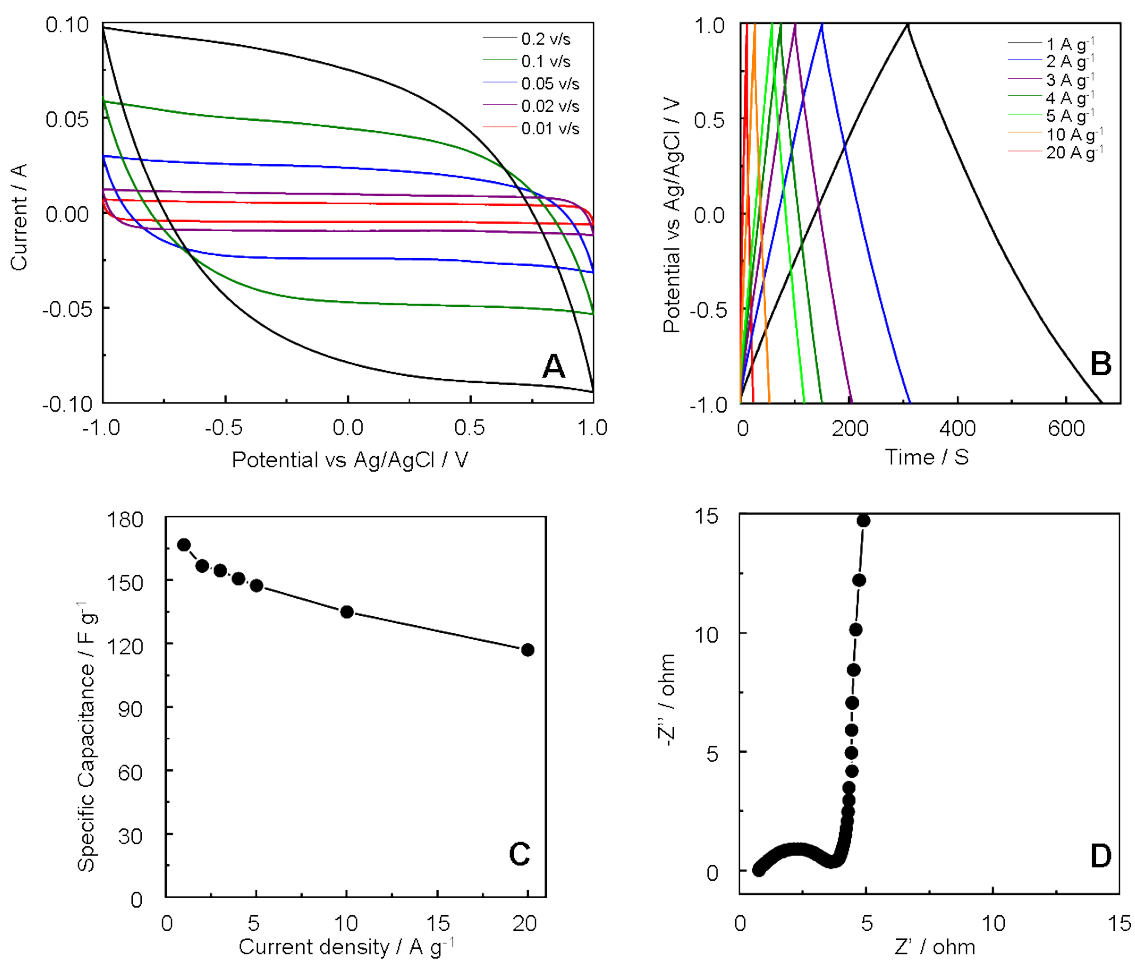

**Figure S7.** (A) CV curves of K-PAF-1; (B) galvanostatic charge–discharge curves of K-PAF-1 at different current density ; (C) capacitance versus current of K-PAF-1; (D) Nyquist plots (frequency ranges from  $10^5$  to  $10^{-2}$  Hz) of K-PAF-1 in BMImBF<sub>4</sub>.

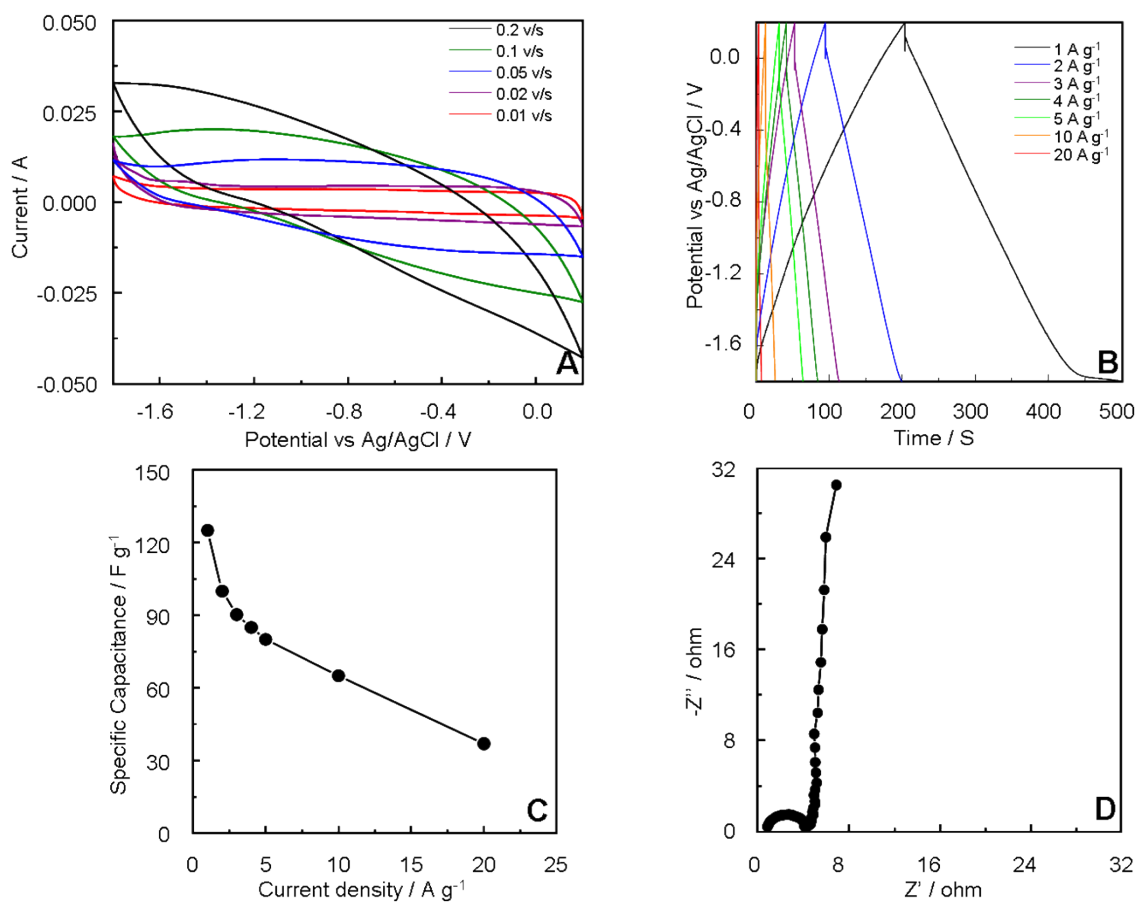

**Figure S8.** (A) CV curves of K-PAF-1; (B) galvanostatic charge–discharge curves of K-PAF-1 at different current density ; (C) capacitance versus current of K-PAF-1; (D) Nyquist plots (frequency ranges from  $10^5$  to  $10^{-2}$  Hz) of K-PAF-1 in TBABF<sub>4</sub>.

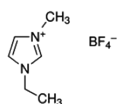

| Equation      | y = a + b*x |           |                |
|---------------|-------------|-----------|----------------|
| Adj. R-Square | 0.98555     |           |                |
|               |             | Value     | Standard Error |
| D             | Intercept   | 157.31953 | 1.30828        |
| D             | Slope       | -40.24593 | 2.17587        |

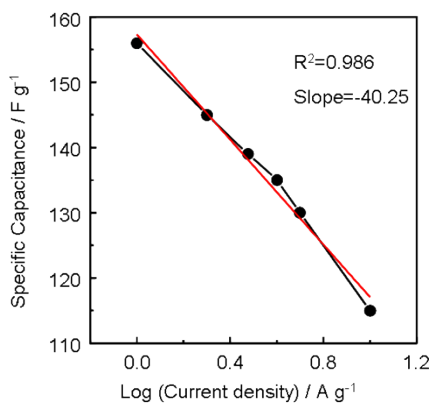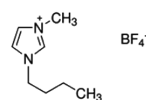

| Equation      | y = a + b*x |           |                |
|---------------|-------------|-----------|----------------|
| Adj. R-Square | 0.98982     |           |                |
|               |             | Value     | Standard Error |
| D             | Intercept   | 176.82348 | 1.13195        |
| D             | Slope       | -41.55273 | 1.8826         |

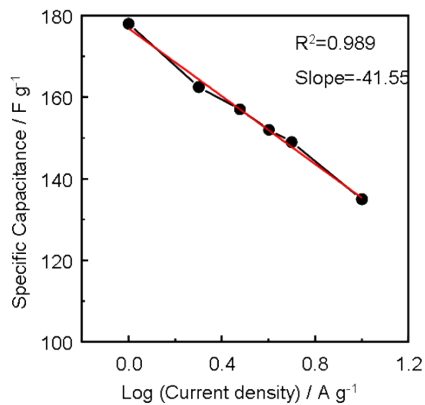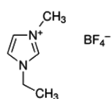

| Equation      | y = a + b*x |           |                |
|---------------|-------------|-----------|----------------|
| Adj. R-Square | 0.98555     |           |                |
|               |             | Value     | Standard Error |
| D             | Intercept   | 157.31953 | 1.30828        |
| D             | Slope       | -40.24593 | 2.17587        |

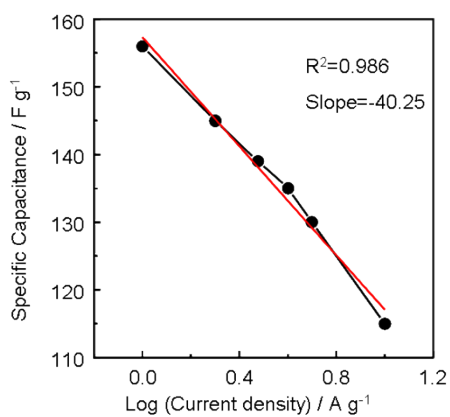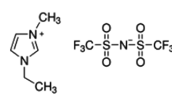

| Equation      | y = a + b*x |           |                |
|---------------|-------------|-----------|----------------|
| Adj. R-Square | 0.99275     |           |                |
|               |             | Value     | Standard Error |
| D             | Intercept   | 201.31583 | 1.75929        |
| D             | Slope       | -76.61415 | 2.92596        |

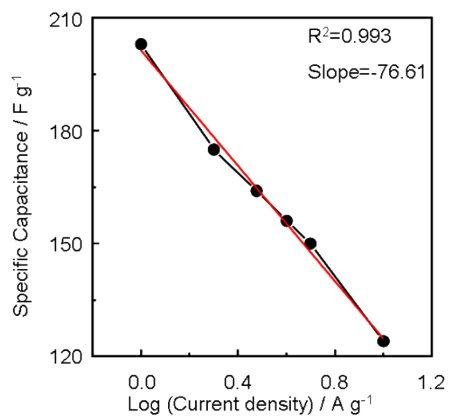

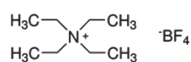

| Equation      | $y = a + b \cdot x$ |           |                |
|---------------|---------------------|-----------|----------------|
| Adj. R-Square | 0.99649             |           |                |
|               |                     | Value     | Standard Error |
| D             | Intercept           | 142.59717 | 0.43279        |
| D             | Slope               | -27.14617 | 0.7198         |

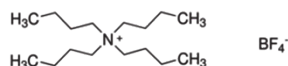

| Equation      | $y = a + b \cdot x$ |           |                |
|---------------|---------------------|-----------|----------------|
| Adj. R-Square | 0.9887              |           |                |
|               |                     | Value     | Standard Error |
| D             | Intercept           | 122.89107 | 1.67705        |
| D             | Slope               | -58.41066 | 2.78919        |

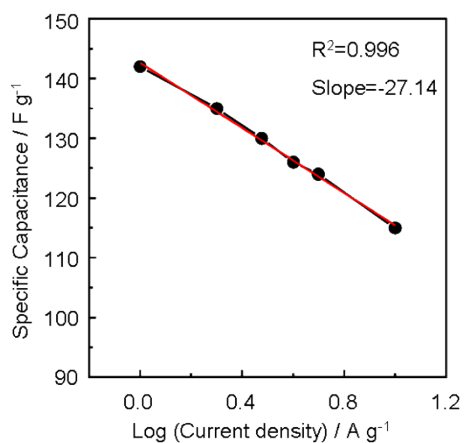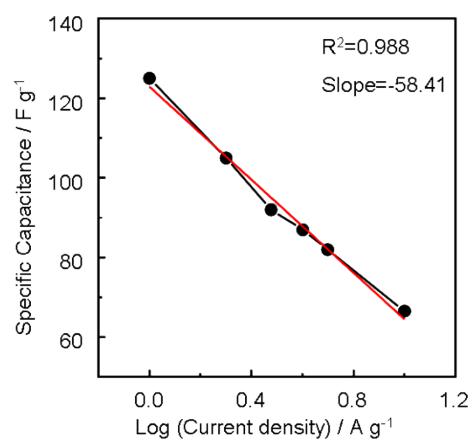

**Figure S9.** Analysis of capacitance decreasing trend with increasing current density.

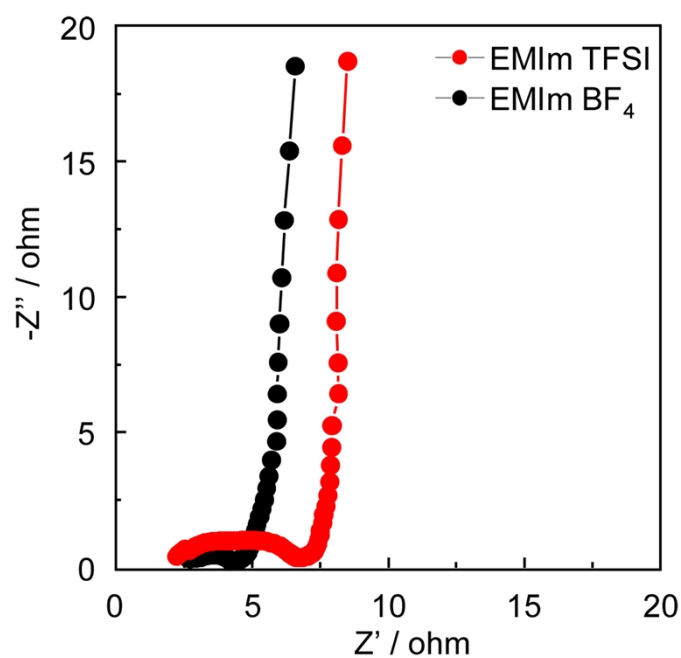

**Figure S10.** Nyquist plot of K-PAF-1 in EMIm TFSI and EMIm BF<sub>4</sub>.

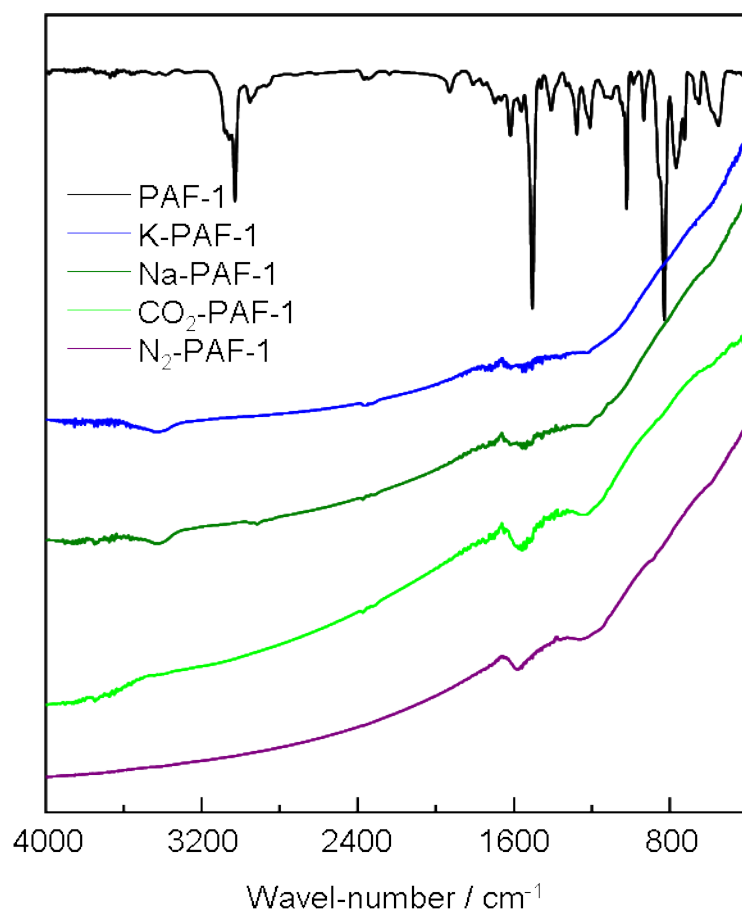

**Figure S11.** FTIR spectra of PAF-1 and the carbonized samples. The disappearance of C-H bands at 800 cm<sup>-1</sup> clearly indicated the elimination of hydrogen. The bands became broader and overlapping due to the strong adsorption of carbon-carbon bonds.

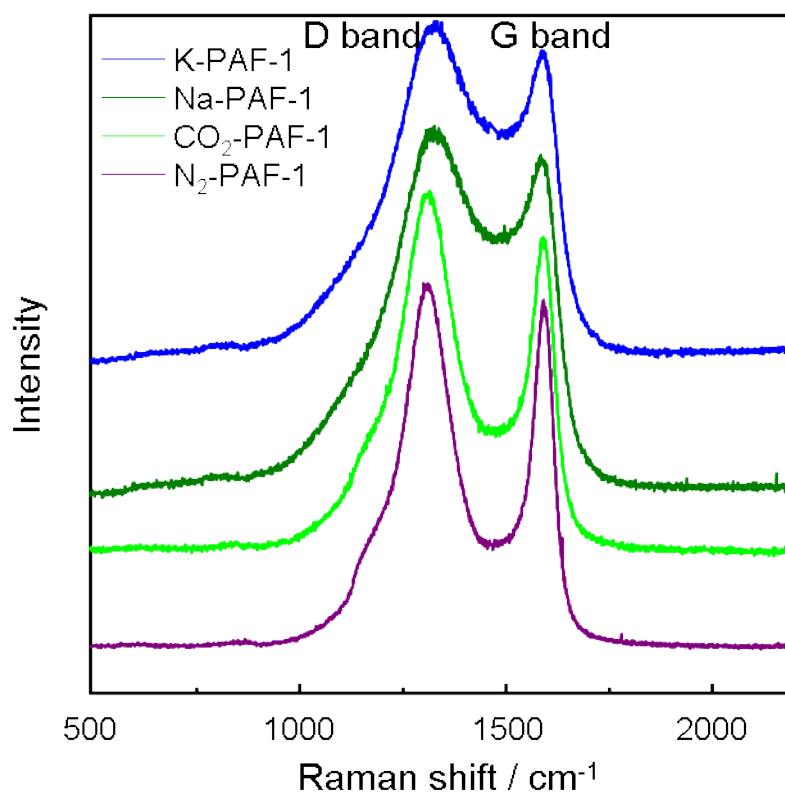

**Figure S12.** Raman spectra of carbonized samples. The Raman spectra of carbonized PAF-1 showed two Raman shifts, the G-band at 1580 cm<sup>-1</sup> is associated with the E<sub>2g</sub> mode of graphite, whereas the D-band centered at around 1380 cm<sup>-1</sup> is attributed to the D-band of disordered carbon, corresponding to the defect-induced mode. The intensity of the D-band to G-band ratio ( $I_D/I_G$ ) was in the range of 1.00-1.04, indicating a low degree of graphitization.

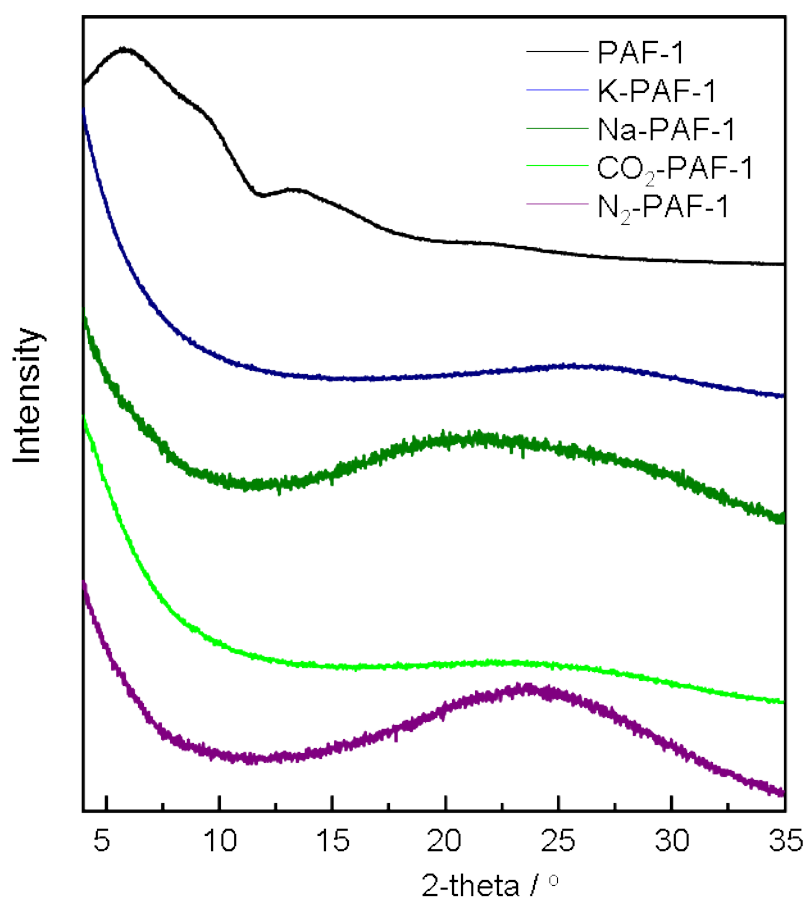

**Figure S13.** PXRD patterns of PAF-1 and the carbonized samples. The broad peak at 24° for carbonized samples is ascribed to the (002) diffraction of carbon. The broad peak indicated that the carbonized PAFs were essentially amorphous.

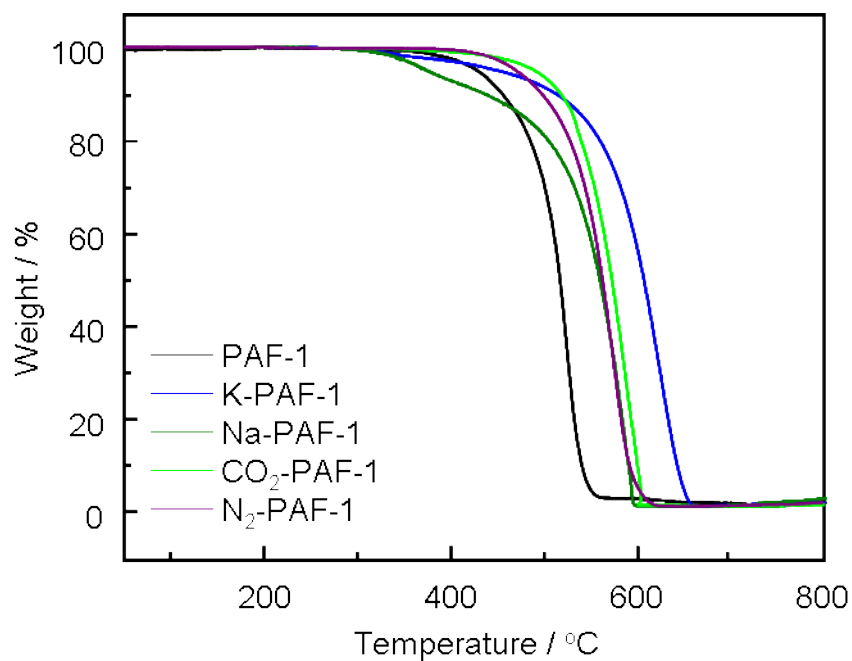

**Figure S14.** TGA of PAF-1 and the carbonized samples. All the samples do not loss weight before 400 °C, indicating excellent thermal stability.

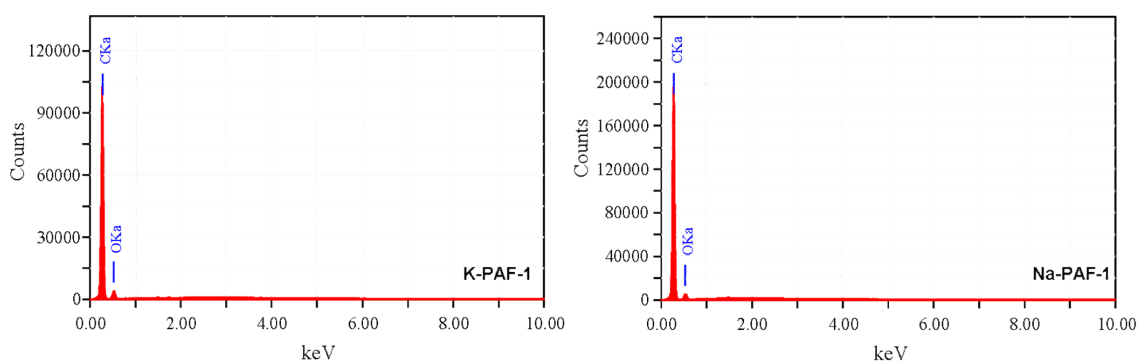

**Figure S15.** EDS spectra of KOH and NaOH activated samples. It can be seen that no potassium left in the carbon framework.



Table S1. Texture properties of PAF-1 and KOH activated samples at different temperatures.

| sample      | Texture properties                                                 |                                |                                                                       |                                                                     |                                                                       |                                                                      |
|-------------|--------------------------------------------------------------------|--------------------------------|-----------------------------------------------------------------------|---------------------------------------------------------------------|-----------------------------------------------------------------------|----------------------------------------------------------------------|
|             | S <sup>a</sup> <sub>BET</sub><br>(m <sup>2</sup> g <sup>-1</sup> ) | Pore size<br>(nm) <sup>b</sup> | V <sub>total</sub> <sup>c</sup><br>(cm <sup>3</sup> g <sup>-1</sup> ) | V <sub>0-1</sub> <sup>d</sup><br>(cm <sup>3</sup> g <sup>-1</sup> ) | V <sub>micro</sub> <sup>e</sup><br>(cm <sup>3</sup> g <sup>-1</sup> ) | V <sub>meso</sub> <sup>f</sup><br>(cm <sup>3</sup> g <sup>-1</sup> ) |
| PAF-1       | 5300                                                               | 1.4                            | 2.43                                                                  | 0.17                                                                | 1.44                                                                  | 0.99                                                                 |
| K-PAF-1-600 | 2325                                                               | 0.61 1.20                      | 1.10                                                                  | 0.54                                                                | 0.88                                                                  | 0.22                                                                 |
| K-PAF-1-750 | 2926                                                               | 0.79 1.30                      | 1.45                                                                  | 0.46                                                                | 1.14                                                                  | 0.31                                                                 |
| K-PAF-1-800 | 2857                                                               | 1.00 (broad)                   | 1.44                                                                  | 0.44                                                                | 1.11                                                                  | 0.33                                                                 |

a. S<sub>BET</sub> was calculated in the partial pressure (p/p<sub>0</sub>) range of 0.01 to 0.1 which gives the best liner. b. Maxima of the pore size distribution calculated from nitrogen sorption using the QSDFT method and slit-shaped pores. c. Total pore volume at relative pressure p/p<sub>0</sub> = 0.99. d. Microporosity attributed to pores less than 1 nm. e. Microporous pore volume for pore less than 2 nm determined. f. Mesopore pore volume attributed to pore larger than 2 nm.

Table S2. Element analysis of carbonized samples.

| samples                     | Element content |             |                 |
|-----------------------------|-----------------|-------------|-----------------|
|                             | C               | H           | N               |
| <b>K-PAF-1</b>              | <b>91.69</b>    | <b>0.44</b> | <b>&lt; 0.3</b> |
| <b>Na-PAF-1</b>             | <b>85.12</b>    | <b>1.78</b> | <b>&lt; 0.3</b> |
| <b>CO<sub>2</sub>-PAF-1</b> | <b>84.76</b>    | <b>0.78</b> | <b>&lt; 0.3</b> |
| <b>N<sub>2</sub>-PAF-1</b>  | <b>84.52</b>    | <b>1.08</b> | <b>&lt; 0.3</b> |
